# Supplementary material
Source: Springer Nature journal article supplement (https://www.springermedizin.de/resource/supplementary/12874_2012_834_MOESM1_ESM.pdf/9432776)
Supplement: MOESM1 [file 9432776]

## Appendix 1. list of the items by dimension

### General Health

|     |                                                                                                     |                    |                |               |                 |                     |
|-----|-----------------------------------------------------------------------------------------------------|--------------------|----------------|---------------|-----------------|---------------------|
| GH1 | In general, would you say your health is:                                                           | 0. Excellent       | 1. Very Good   | 2. Good       | 3. Fair         | 4. Poor             |
| GH2 | How true or false is the following statement? I seem to get sick a little easier than other people. | 0. Definitely true | 1. Mostly true | 2. Don't know | 3. Mostly false | 4. Definitely false |
| GH3 | How true or false is the following statement? I am as healthy as anybody I know.                    | 0. Definitely true | 1. Mostly true | 2. Don't know | 3. Mostly false | 4. Definitely false |
| GH4 | How true or false is the following statement? I expect my health to get worse.                      | 0. Definitely true | 1. Mostly true | 2. Don't know | 3. Mostly false | 4. Definitely false |
| GH5 | How true or false is the following statement? My health is excellent.                               | 0. Definitely true | 1. Mostly true | 2. Don't know | 3. Mostly false | 4. Definitely false |

### Physical Functioning

|      |                                                                                                                                                                   |                       |                          |                           |
|------|-------------------------------------------------------------------------------------------------------------------------------------------------------------------|-----------------------|--------------------------|---------------------------|
| PF1  | Does your health now limit you in this activity? If so, how much? Vigorous activities, such as running, lifting heavy objects, participating in strenuous sports. | 0. Yes, limited a lot | 1. Yes, limited a little | 2. No, not limited at all |
| PF2  | Does your health now limit you in this activity? If so, how much? Moderate activities, such as moving a table, pushing a vacuum cleaner, bowling or playing golf. | 0. Yes, limited a lot | 1. Yes, limited a little | 2. No, not limited at all |
| PF3  | Does your health now limit you in this activity? If so, how much? Lifting or carrying groceries.                                                                  | 0. Yes, limited a lot | 1. Yes, limited a little | 2. No, not limited at all |
| PF4  | Does your health now limit you in this activity? If so, how much? Climbing several flights of stairs.                                                             | 0. Yes, limited a lot | 1. Yes, limited a little | 2. No, not limited at all |
| PF5  | Does your health now limit you in this activity? If so, how much? Climbing one flight of stairs.                                                                  | 0. Yes, limited a lot | 1. Yes, limited a little | 2. No, not limited at all |
| PF6  | Does your health now limit you in this activity? If so, how much? Bending, kneeling, or stooping.                                                                 | 0. Yes, limited a lot | 1. Yes, limited a little | 2. No, not limited at all |
| PF7  | Does your health now limit you in this activity? If so, how much? Walking more than a mile.                                                                       | 0. Yes, limited a lot | 1. Yes, limited a little | 2. No, not limited at all |
| PF8  | Does your health now limit you in this activity? If so, how much? Walking several blocks.                                                                         | 0. Yes, limited a lot | 1. Yes, limited a little | 2. No, not limited at all |
| PF9  | . Does your health now limit you in this activity? If so, how much? Walking one block.                                                                            | 0. Yes, limited a lot | 1. Yes, limited a little | 2. No, not limited at all |
| PF10 | Does your health now limit you in this activity? If so, how much? Bathing or dressing yourself.                                                                   | 0. Yes, limited a lot | 1. Yes, limited a little | 2. No, not limited at all |

### Mental Health

|     |                                                                                                                   |                    |                     |                           |                     |                         |                     |
|-----|-------------------------------------------------------------------------------------------------------------------|--------------------|---------------------|---------------------------|---------------------|-------------------------|---------------------|
| MH1 | How much of the time during the past 4 weeks: Have you been a very nervous person?                                | 0. All of the time | 1. Most of the time | 2. A good bit of the time | 3. Some of the time | 4. A little of the time | 5. None of the time |
| MH2 | How much of the time during the past 4 weeks: Have you felt so down in the dumps that nothing could cheer you up? | 0. All of the time | 1. Most of the time | 2. A good bit of the time | 3. Some of the time | 4. A little of the time | 5. None of the time |
| MH3 | How much of the time during the past 4 weeks: Have you felt calm and peaceful?                                    | 0. All of the time | 1. Most of the time | 2. A good bit of the time | 3. Some of the time | 4. A little of the time | 5. None of the time |
| MH4 | How much of the time during the past 4 weeks: Have you felt downhearted and blue?                                 | 0. All of the time | 1. Most of the time | 2. A good bit of the time | 3. Some of the time | 4. A little of the time | 5. None of the time |
| MH5 | How much of the time during the past 4 weeks: Have you been a happy person?                                       | 0. All of the time | 1. Most of the time | 2. A good bit of the time | 3. Some of the time | 4. A little of the time | 5. None of the time |
